# Supplementary material for: Fibroblast Growth Factor‐23 and Heart Failure With Reduced Versus Preserved Ejection Fraction: MESA
Source: PubMed Central journal article supplement — J Am Heart Assoc. 2018 Sep 11;7(18):e008334. doi: 10.1161/JAHA.117.008334 (PMC6222949; doi:10.1161/jaha.117.008334), 2018-09-11
Supplement: JAH3-7-e008334-s001.pdf [file JAH3-7-e008334-s001.pdf]

# **SUPPLEMENTAL MATERIAL**

**Table S1. Associations of FGF-23 and incident unclassified HF (Hazard ratios for each 20 pg/ml higher FGF-23 concentration): The Multi-Ethnic Study of Atherosclerosis.**

| <b>Model</b>   | <b>Incident unclassified HF events</b> | <b>Hazard ratio (95% CI)</b> | <b>P value</b> |
|----------------|----------------------------------------|------------------------------|----------------|
| <b>Model 1</b> | 49                                     | 1.28<br>(0.97-1.68)          | 0.078          |
| <b>Model 2</b> | 49                                     | 1.08<br>(0.77-1.53)          | 0.649          |
| <b>Model 3</b> | 48                                     | 1.02<br>(0.72-1.46)          | 0.907          |
| <b>Model 4</b> | 48                                     | 0.91<br>(0.59, 1.42)         | 0.683          |

Cox proportional models were used to calculate the hazards ratios for the development of incident HF, HF<sub>r</sub>EF and HF<sub>p</sub>EF with each 20 pg/ml higher serum FGF-23 concentration. Model 1; unadjusted, Model 2; adjusted for age, sex, race/ethnicity, education, study site, height and weight Model 3 adjusted for model 2 and systolic blood pressure, antihypertensive medications, diabetes mellitus, smoking, C-reactive protein, urine albumin-creatinine ratio and eGFR<sub>CKD-EPI</sub>.

**Table S2. Associations of FGF-23 and incident HFpEF before and after adjustment for LV mass (Hazard ratios for each 20 pg/ml higher FGF-23 concentration): The Multi-Ethnic Study of Atherosclerosis.**

| <b>Model</b>             | <b>Incident HFpEF events</b> | <b>Hazard ratio (95% CI)</b> | <b>P value</b> |
|--------------------------|------------------------------|------------------------------|----------------|
| <b>Model 4</b>           | 93                           | 1.31<br>(1.09, 1.57)         | 0.033          |
| <b>Model 4 + LV mass</b> | 93                           | 1.28<br>(1.02, 1.62)         | 0.035          |

Cox proportional models were used to calculate the hazards ratios for the development of incident HFpEF with each 20 pg/ml higher serum FGF-23 concentration. (Only participants with baseline CMR derived LV mass were included N= 4827). Model 3; adjusted for age, sex, race/ethnicity, education, study site, height, weight, systolic blood pressure, antihypertensive medications, diabetes mellitus, smoking, C-reactive protein, urine albumin-creatinine ratio and eGFR<sub>CKD-EPI</sub>.

**Table S3. Associations of FGF-23 and incident HF, HF<sub>r</sub>EF and HF<sub>p</sub>EF (Hazard ratios for each 20 pg/ml higher FGF-23 concentration using time-updated covariates): The Multi-Ethnic Study of Atherosclerosis.**

|                                  |                      | <b>Participants (n)</b> | <b>Events (n)</b> | <b>Model 1</b>       | <b>Model 2</b>       | <b>Model 3</b>       | <b>Model 4</b>       |
|----------------------------------|----------------------|-------------------------|-------------------|----------------------|----------------------|----------------------|----------------------|
|                                  |                      |                         |                   | HR<br>(95% CI)       | HR<br>(95% CI)       | HR<br>(95% CI)       | HR<br>(95% CI)       |
| <b>Incident HF</b>               |                      |                         |                   |                      |                      |                      |                      |
| <b>FGF-23</b>                    | per 20 pg/L increase | 6542                    | 291               | 1.34<br>(1.21, 1.48) | 1.22<br>(1.10, 1.35) | 1.14<br>(1.01, 1.29) | 1.17<br>(1.01, 1.35) |
| <b>Incident HF<sub>r</sub>EF</b> |                      |                         |                   |                      |                      |                      |                      |
| <b>FGF-23</b>                    | per 20 pg/L increase | 6542                    | 176               | 1.28<br>(1.11, 1.48) | 1.17<br>(1.02, 1.35) | 1.07<br>(0.90, 1.26) | 1.02<br>(0.82, 1.26) |
| <b>Incident HF<sub>p</sub>EF</b> |                      |                         |                   |                      |                      |                      |                      |
| <b>FGF-23</b>                    | per 20 pg/L increase | 6542                    | 149               | 1.44<br>(1.27, 1.62) | 1.27<br>(1.12, 1.45) | 1.18<br>(1.02, 1.39) | 1.25<br>(1.03, 1.50) |

Cox proportional models were used to calculate the hazards ratios for the development of incident HF, HF<sub>r</sub>EF and HF<sub>p</sub>EF with each 20 pg/ml higher serum FGF-23 concentration and again with quartiles of FGF-23. Model 1; unadjusted, Model 2; adjusted for age, sex, race/ethnicity, education, study site, height and weight; Model 3 adjusted for model 2 and systolic blood pressure, antihypertensive medications, diabetes mellitus, smoking, C-reactive protein, urine albumin-creatinine ratio and eGFR<sub>CKD-EPI</sub>. Model 4 is further adjusted for NT-proBNP, 25(OH)vitD, PTH and Phosphate.

**Table S4. Associations of FGF-23 and incident HFrEF and HFpEF (Hazard ratios for each 20 pg/ml higher FGF-23 concentration using complete case analysis): The Multi-Ethnic Study of Atherosclerosis.**

|                       |                      | Participants (n) | Events (n) | Model 1              | Model 2              | Model 3              | Model 4              |
|-----------------------|----------------------|------------------|------------|----------------------|----------------------|----------------------|----------------------|
|                       |                      |                  |            | HR<br>(95% CI)       | HR<br>(95% CI)       | HR<br>(95% CI)       | HR<br>(95% CI)       |
| <b>Incident HFrEF</b> |                      |                  |            |                      |                      |                      |                      |
| <b>FGF-23</b>         | per 20 pg/L increase | 6542             | 151        | 1.37<br>(1.16, 1.61) | 1.31<br>(1.09, 1.59) | 1.20<br>(0.98, 1.47) | 1.13<br>(0.93, 1.41) |
|                       | Q1                   | 1638             | 19         | 1.00<br>(Reference)  | 1.00<br>(Reference)  | 1.00<br>(Reference)  | 1.00<br>(Reference)  |
|                       | Q2                   | 1636             | 36         | 1.86<br>(0.99, 3.48) | 1.70<br>(0.90, 3.18) | 1.77<br>(0.94, 3.33) | 1.75<br>(0.93, 3.30) |
|                       | Q3                   | 1634             | 46         | 2.10<br>(1.13, 3.87) | 1.79<br>(0.96, 3.32) | 1.91<br>(1.02, 3.57) | 1.78<br>(0.95, 3.35) |
|                       | Q4                   | 1634             | 50         | 2.71<br>(1.49, 4.90) | 2.08<br>(1.14, 3.82) | 1.92<br>(1.03, 3.61) | 1.75<br>(0.92, 3.31) |
| <b>Incident HFpEF</b> |                      |                  |            |                      |                      |                      |                      |
| <b>FGF-23</b>         | per 20 pg/L increase | 6542             | 134        | 1.48<br>(1.28, 1.71) | 1.37<br>(1.16, 1.63) | 1.32<br>(1.11, 1.57) | 1.31<br>(1.09, 1.57) |
|                       | Q1                   | 1638             | 22         | 1.00<br>(Reference)  | 1.00<br>(Reference)  | 1.00<br>(Reference)  | 1.00<br>(Reference)  |
|                       | Q2                   | 1636             | 24         | 1.06<br>(0.54, 2.10) | 0.92<br>(0.46, 1.82) | 0.97<br>(0.49, 1.92) | 0.96<br>(0.48, 1.91) |
|                       | Q3                   | 1634             | 35         | 1.90<br>(1.04, 3.47) | 1.46<br>(0.80, 2.69) | 1.59<br>(0.86, 2.94) | 1.53<br>(0.82, 2.83) |
|                       | Q4                   | 1634             | 53         | 2.81<br>(1.58, 4.97) | 1.86<br>(1.04, 3.34) | 1.89<br>(1.03, 3.46) | 1.77<br>(0.96, 3.27) |

Model 1; unadjusted, Model 2; adjusted for age, sex, race/ethnicity, education, study site, height and weight; Model 3 adjusted for model 2 and systolic blood pressure, antihypertensive medications, diabetes mellitus, smoking, C-reactive protein, urine albumin-creatinine ratio and eGFR<sub>CKD-EPI</sub>. Model 4 is further adjusted for NT-proBNP, 25(OH)vitd, PTH and Phosphate.
